# Supplementary material for: Upconverting nanoparticle to quantum dot FRET for homogeneous double-nano biosensors
Source: Royal Society of Chemistry journal article supplement (doi:10.1039/c5ra00397k), 2015-01-01
Supplement: c5ra00397k1.pdf [file c5ra00397k1.pdf]

## SUPPORTING INFORMATION

# Upconverting Nanoparticle to Quantum Dot FRET for Homogeneous Double-Nano Biosensors

Leena Mattsson<sup>1</sup>, K. David Wegner<sup>2</sup>, Niko Hildebrandt<sup>2</sup> and Tero Soukka<sup>1\*</sup>

<sup>1</sup> Department of Biotechnology, University of Turku, Turku, Finland

<sup>2</sup> NanoBioPhotonics, Institut d'Electronique Fondamentale, Université Paris-Sud, Orsay, France

[\*] Corresponding author: Tero Soukka, Department of Biotechnology, University of Turku, Tykistökatu 6A, FI-20520 Turku (Finland), Tel.: +358-2-333-8685, Fax.: +358-2-333-8050, Email: [tero.soukka@utu.fi](mailto:tero.soukka@utu.fi).

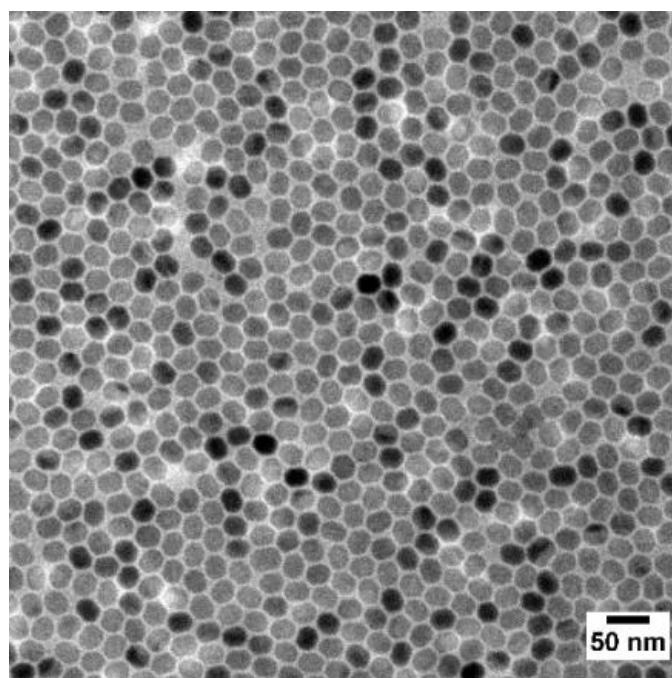

**Figure S1.** Transmission electron microscopy (TEM) image of the UCNPs with an average dimensions of ca. 23x26x36 nm. (Tecnai 12 BioTwin TEM, 120 kV; FEI, Hillsboro, OR).

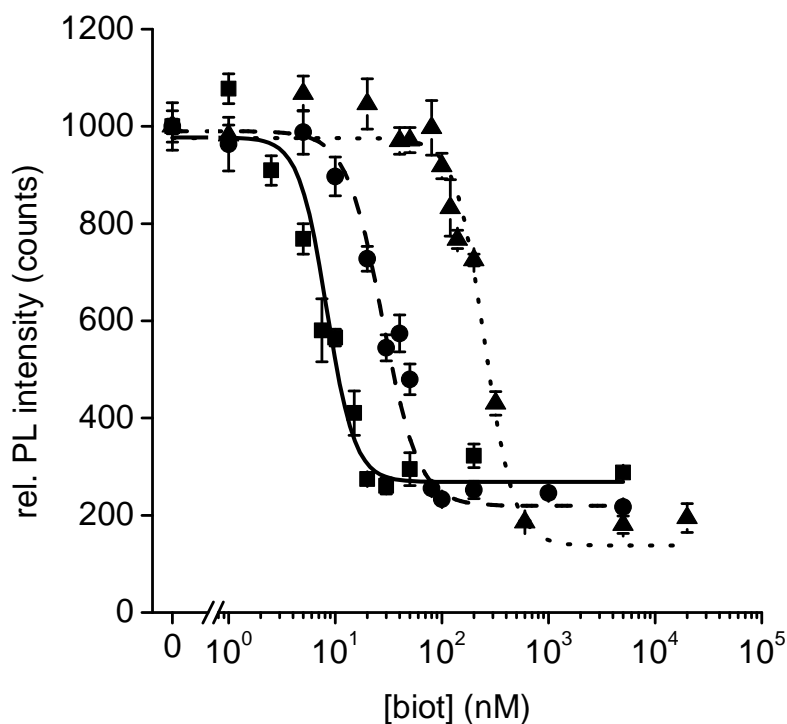

**Figure S2.** Competitive homogeneous assay for biotin. 75 (solid line), 300 (dashed line) and 1200 pM (dotted line) UCNP-sAv in the presence of 250, 1000 and 4000 pM of biot-QD, respectively, and different concentrations of free biotin (0 to 20 000 nM). Sensitized emission signals were normalized using signal from the reaction containing no biotin (maximal sensitized emission signal) as a reference.
